# Supplementary material
Source: PubMed Central journal article supplement (PMC3225893)

**A**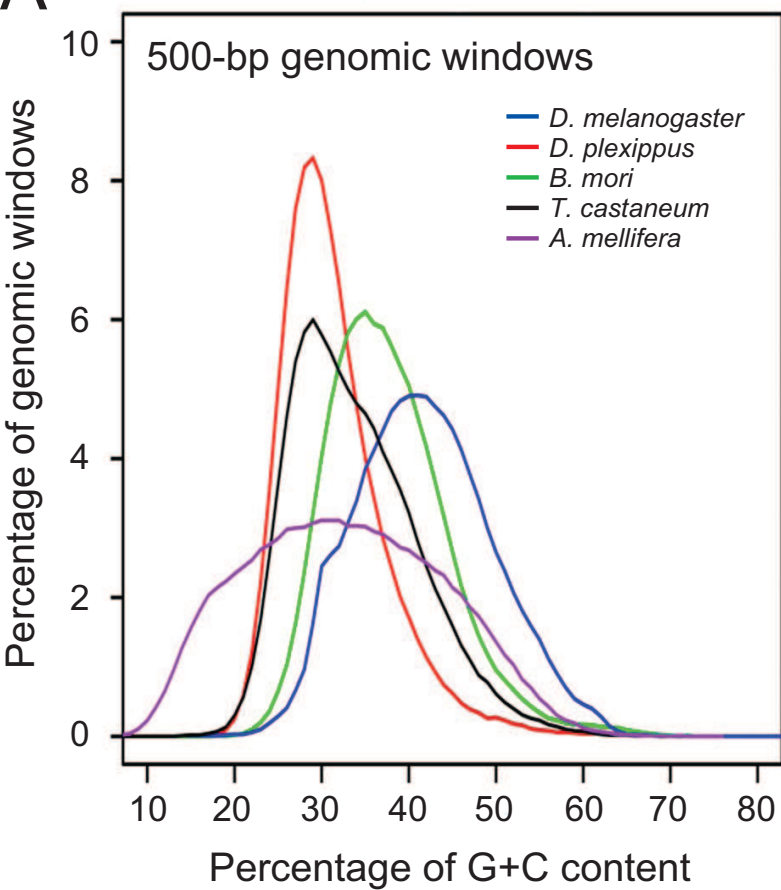**B**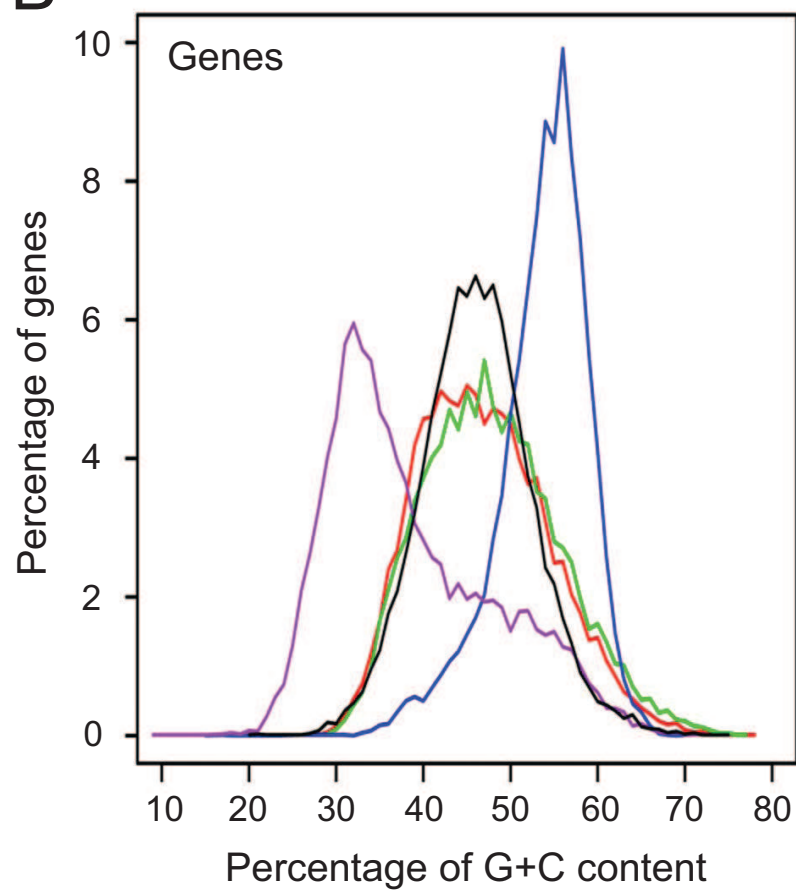**C**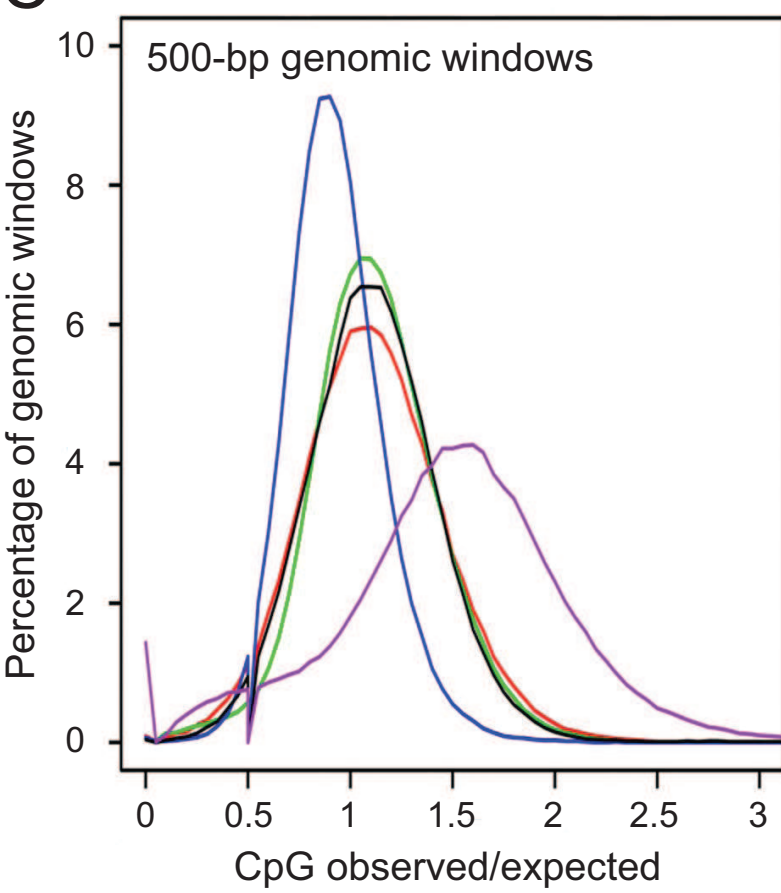**D**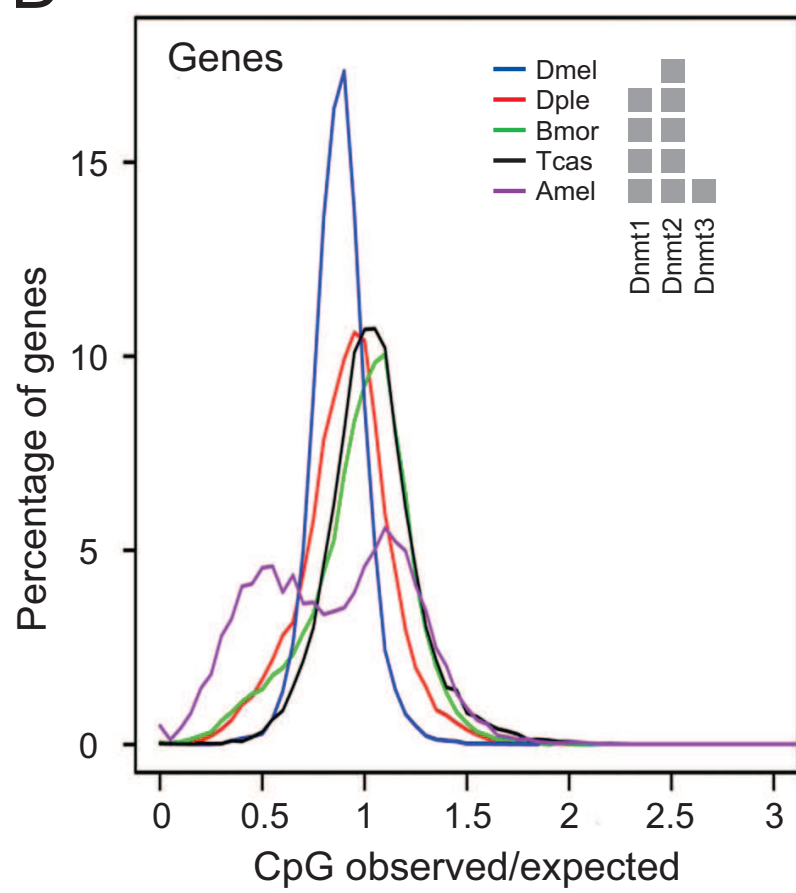

A

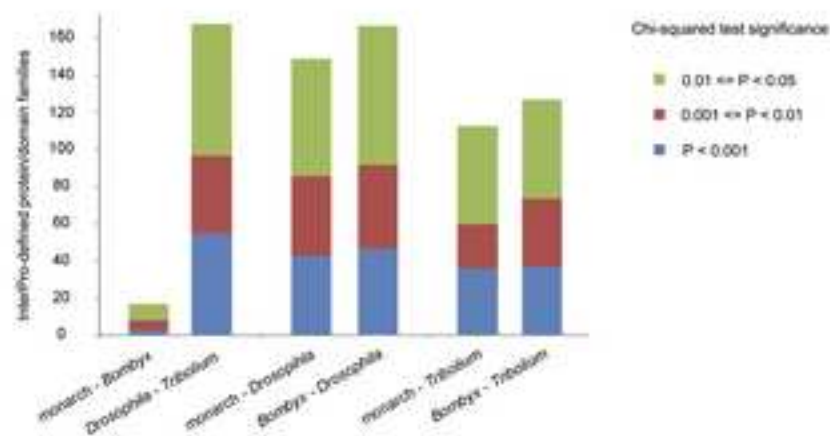

B

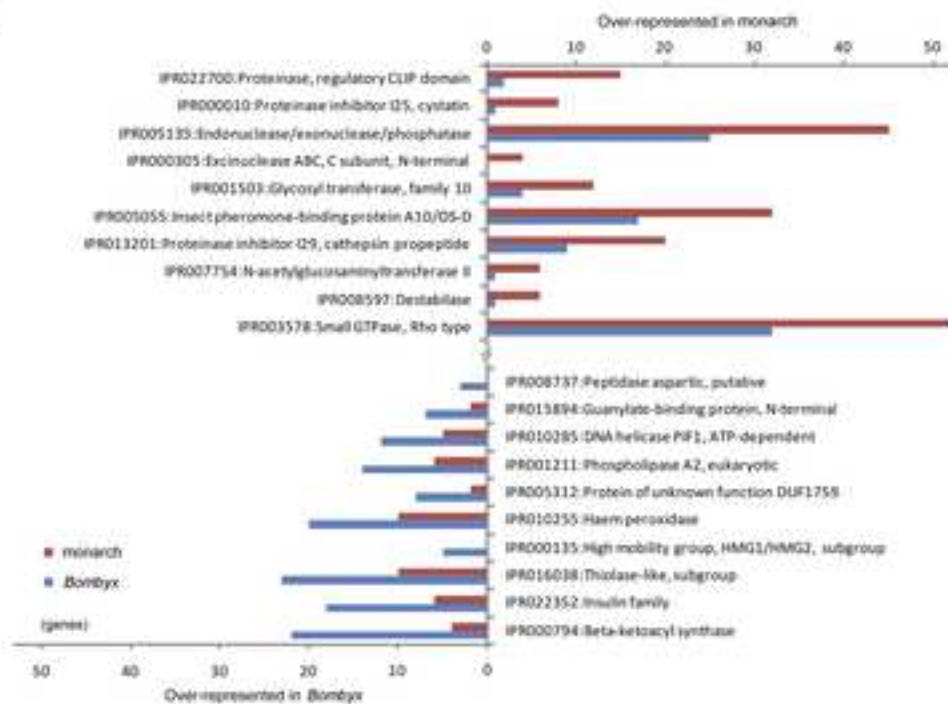

C

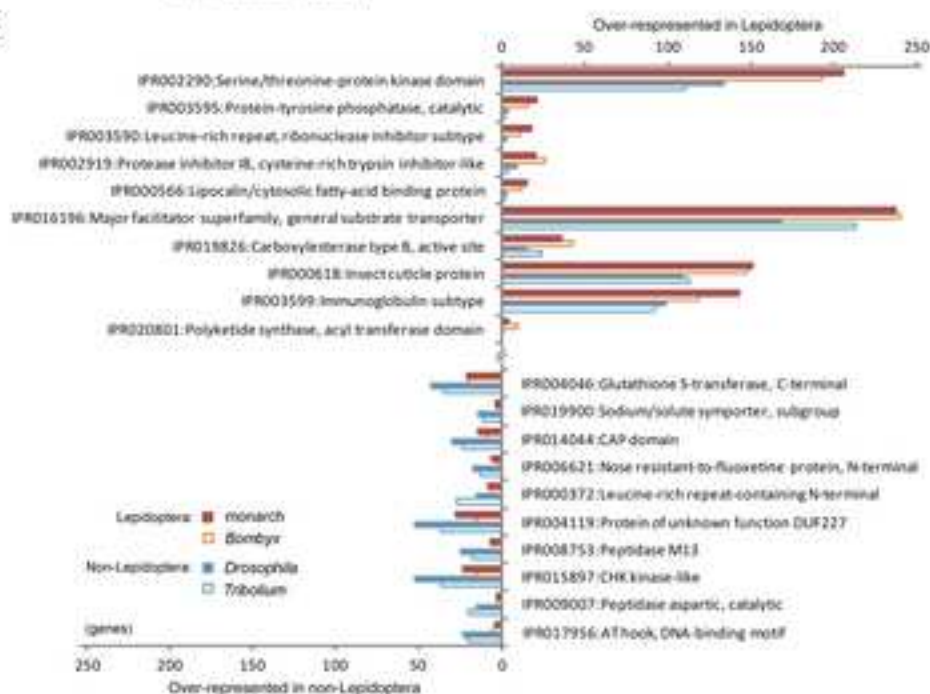

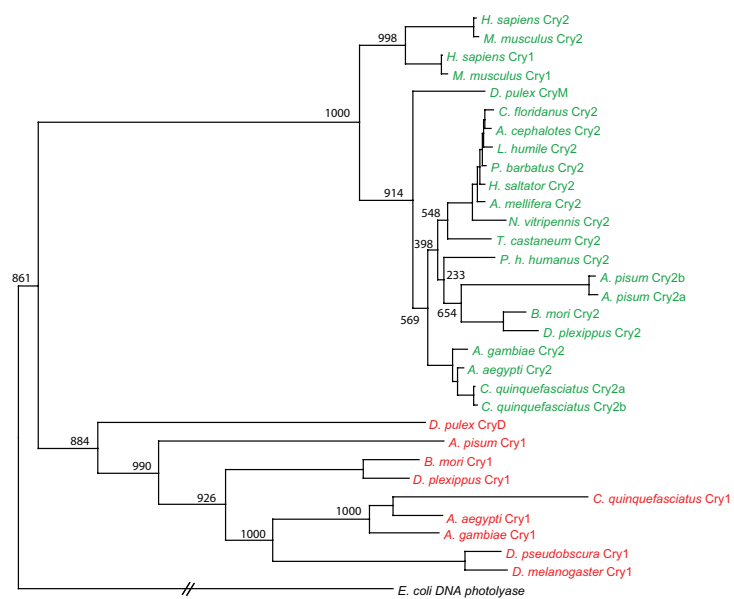

Supplement: NIHMS335000-supplement-02.pdf [file NIHMS335000-supplement-02.pdf]
